# Supplementary material for: Mitosis Is a Source of Potential Markers for Screening and Survival and Therapeutic Targets in Cervical Cancer
Source: PLoS One. 2013 Feb 6;8(2):e55975. doi: 10.1371/journal.pone.0055975 (PMC3566100; doi:10.1371/journal.pone.0055975)
Supplement: Table S5 — DAVID functional annotation cluster analysis at medium stringency of 997 genes desregulated in cervical cancer*. * Enrichment Score is the -log10 of the average p-value of the terms in the cluster. Fold change is the ratio of the proportion of genes in the tested list versus the Human Gene Reference database. (XLSX) [file pone.0055975.s008.xlsx]

## Sheet: Table S5
	Table S5. DAVID functional annotation cluster analysis at medium stringency of 997 genes desregulated in cervical cancer*
	Annotation Cluster 1	Enrichment Score: 19.92	No. Genes	p-value	Fold Change
		cell cycle process	123	1.1e-34	3.4
		mitotic cell cycle	94	7.1e-32	4
		cell cycle	140	2.1e-30	2.8
		cell cycle phase	88	5.7e-24	3.3
		M phase	72	2e-20	3.4
		cell division	62	8.9e-17	3.3
		nuclear division	51	1.4e-15	3.6
		mitosis	51	1.4e-15	3.6
		M phase of mitotic cell cycle	51	3e-15	3.6
		organelle fission	51	7.5e-15	3.5
		chromosome segregation	21	1.1e-07	4.1
	Annotation Cluster 2	Enrichment Score: 11.59	No. Genes	p-value	Fold Change
		DNA metabolic process	99	4.3e-24	3.1
		DNA repair	51	4e-11	2.8
		response to stress	173	8e-11	1.6
		response to DNA damage stimulus	58	5.3e-10	2.4
		cellular response to stimulus	99	6.6e-10	1.9
		cellular response to stress	71	5.7e-08	2
	Annotation Cluster 3	Enrichment Score: 9.53	No. Genes	p-value	Fold Change
		negative regulation of protein ubiquitination	31	2.4e-17	6.6
		regulation of ubiquitin-protein ligase activity during mitotic cell cycle	30	6.3e-17	6.6
		negative regulation of ligase activity	29	1.1e-16	6.8
		negative regulation of ubiquitin-protein ligase activity	29	1.1e-16	6.8
		regulation of ubiquitin-protein ligase activity	31	1.3e-16	6.2
		negative regulation of ubiquitin-protein ligase activity during mitotic cell cycle	28	4.5e-16	6.8
		anaphase-promoting complex-dependent proteasomal ubiquitin-dependent protein catabolic process	28	4.5e-16	6.8
		regulation of ligase activity	31	4.6e-16	6
		regulation of protein ubiquitination	34	9.2e-16	5.3
		positive regulation of ubiquitin-protein ligase activity during mitotic cell cycle	27	1.9e-14	6.2
		positive regulation of ubiquitin-protein ligase activity	27	4.3e-14	6
		negative regulation of protein modification process	35	4.3e-14	4.6
		positive regulation of ligase activity	27	1.4e-13	5.8
		positive regulation of protein ubiquitination	28	8e-13	5.2
		proteasomal protein catabolic process	30	3.7e-12	4.6
		proteasomal ubiquitin-dependent protein catabolic process	30	3.7e-12	4.6
		regulation of protein metabolic process	78	2.5e-11	2.2
		negative regulation of cellular protein metabolic process	39	3.9e-11	3.4
		regulation of protein modification process	52	5e-11	2.8
		negative regulation of protein metabolic process	39	1.3e-10	3.3
		positive regulation of protein modification process	38	5e-10	3.2
		positive regulation of protein metabolic process	44	8e-10	2.8
		regulation of cellular protein metabolic process	67	1.2e-09	2.2
		positive regulation of catalytic activity	71	1.7e-09	2.1
		positive regulation of molecular function	77	1.8e-09	2.1
		positive regulation of cellular protein metabolic process	41	7.7e-09	2.8
		regulation of catalytic activity	97	1.5e-08	1.8
		regulation of molecular function	107	1.8e-08	1.7
		negative regulation of catalytic activity	42	3.5e-07	2.4
		ubiquitin-dependent protein catabolic process	38	5.8e-07	2.5
		negative regulation of molecular function	46	1.4e-06	2.2
		cellular catabolic process	99	2.5e-05	1.5
		catabolic process	116	3.2e-05	1.5
		cellular macromolecule catabolic process	73	0.0001	1.6
		macromolecule catabolic process	76	0.00021	1.5
		proteolysis involved in cellular protein catabolic process	58	0.0015	1.5
		proteolysis	92	0.0016	1.4
		cellular protein catabolic process	58	0.0017	1.5
		protein catabolic process	59	0.0021	1.5
		modification-dependent protein catabolic process	54	0.004	1.5
		modification-dependent macromolecule catabolic process	54	0.004	1.5
	Annotation Cluster 4	Enrichment Score: 7.97	No. Genes	p-value	Fold Change
		response to chemical stimulus	150	9.8e-14	1.8
		response to organic substance	96	5.6e-12	2.1
		response to endogenous stimulus	60	1.7e-09	2.3
		response to hormone stimulus	53	4.2e-08	2.3
		response to steroid hormone stimulus	32	1.5e-06	2.6
		response to estrogen stimulus	22	2.3e-06	3.3
		response to estradiol stimulus	13	0.00012	3.8
	Annotation Cluster 5	Enrichment Score: 7.26	No. Genes	p-value	Fold Change
		spindle organization	21	6.8e-13	7.3
		cytoskeleton organization	57	3.7e-07	2.1
		microtubule cytoskeleton organization	28	5.3e-07	3
		microtubule-based process	34	6.8e-05	2.1
	Annotation Cluster 6	Enrichment Score: 5.53	No. Genes	p-value	Fold Change
		organ development	172	1.6e-09	1.6
		system development	210	4.5e-08	1.4
		multicellular organismal development	248	5.6e-08	1.4
		developmental process	268	5.6e-08	1.3
		anatomical structure development	222	1.2e-07	1.4
		anatomical structure morphogenesis	115	6.5e-06	1.5
		multicellular organismal process	315	0.0012	1.2
		cell differentiation	129	0.0071	1.2
		cellular developmental process	132	0.012	1.2
	Annotation Cluster 7	Enrichment Score: 5.5	No. Genes	p-value	Fold Change
		negative regulation of biological process	212	5.4e-20	1.8
		negative regulation of cellular process	195	1.8e-18	1.8
		negative regulation of cellular metabolic process	95	1.2e-11	2.1
		negative regulation of metabolic process	96	4.5e-10	1.9
		negative regulation of macromolecule metabolic process	88	9.7e-09	1.9
		negative regulation of nitrogen compound metabolic process	52	0.0013	1.6
		negative regulation of nucleobase, nucleoside, nucleotide and nucleic acid metabolic process	51	0.0016	1.6
		negative regulation of cellular biosynthetic process	52	0.0061	1.5
		negative regulation of biosynthetic process	52	0.0093	1.4
		negative regulation of macromolecule biosynthetic process	49	0.014	1.4
		negative regulation of transcription	40	0.04	1.4
		negative regulation of RNA metabolic process	31	0.084	1.3
		negative regulation of gene expression	41	0.087	1.3
		negative regulation of transcription, DNA-dependent	30	0.1	1.3
		negative regulation of transcription from RNA polymerase II promoter	23	0.13	1.4
	Annotation Cluster 8	Enrichment Score: 5.38	No. Genes	p-value	Fold Change
		interphase	24	1.7e-07	3.6
		interphase of mitotic cell cycle	23	4.1e-07	3.5
		regulation of cyclin-dependent protein kinase activity	14	2.5e-05	4.1
		G1/S transition of mitotic cell cycle	13	0.00017	3.6
	Annotation Cluster 9	Enrichment Score: 5.23	No. Genes	p-value	Fold Change
		chordate embryonic development	45	2.7e-06	2.1
		embryonic development	66	2.7e-06	1.8
		embryonic development ending in birth or egg hatching	45	3.4e-06	2.1
		in utero embryonic development	27	5e-05	2.4
	Annotation Cluster 10	Enrichment Score: 4.89	No. Genes	p-value	Fold Change
		regulation of cell cycle	61	1.1e-13	2.9
		regulation of mitotic cell cycle	30	8.6e-08	3.1
		cell cycle checkpoint	22	1.9e-07	3.8
		regulation of cell cycle process	23	2.5e-06	3.2
		regulation of organelle organization	32	1.9e-05	2.3
		regulation of mitosis	13	0.00017	3.6
		regulation of nuclear division	13	0.00017	3.6
		positive regulation of cell cycle	10	0.0094	2.8
		positive regulation of mitosis	5	0.071	3.1
		positive regulation of nuclear division	5	0.071	3.1
	Annotation Cluster 11	Enrichment Score: 4.56	No. Genes	p-value	Fold Change
		chromosome segregation	21	1.1e-07	4.1
		mitotic sister chromatid segregation	12	9e-06	5.2
		sister chromatid segregation	12	1.2e-05	5.1
		mitotic chromosome condensation	4	0.046	4.8
	Annotation Cluster 12	Enrichment Score: 4.29	No. Genes	p-value	Fold Change
		regulation of programmed cell death	90	2.5e-07	1.7
		regulation of cell death	90	3e-07	1.7
		regulation of apoptosis	89	3.1e-07	1.7
		negative regulation of programmed cell death	46	9.9e-06	2
		negative regulation of cell death	46	1.1e-05	2
		negative regulation of apoptosis	45	1.5e-05	2
		positive regulation of apoptosis	48	0.0002	1.8
		positive regulation of programmed cell death	48	0.00023	1.7
		positive regulation of cell death	48	0.00026	1.7
		anti-apoptosis	27	0.00065	2.1
		induction of apoptosis	30	0.034	1.5
		induction of programmed cell death	30	0.036	1.5
	Annotation Cluster 13	Enrichment Score: 4.27	No. Genes	p-value	Fold Change
		meiotic cell cycle	21	4e-06	3.3
		meiosis	20	1.1e-05	3.2
		M phase of meiotic cell cycle	20	1.1e-05	3.2
		meiosis I	8	0.016	3
	Annotation Cluster 14	Enrichment Score: 4	No. Genes	p-value	Fold Change
		regulation of cellular component organization	56	3.9e-06	1.9
		regulation of organelle organization	32	1.9e-05	2.3
		negative regulation of cellular component organization	21	0.00067	2.3
		negative regulation of organelle organization	14	0.0019	2.7
	Annotation Cluster 15	Enrichment Score: 3.96	No. Genes	p-value	Fold Change
		macromolecular complex assembly	72	1.1e-05	1.7
		macromolecular complex subunit organization	75	1.6e-05	1.7
		cellular macromolecular complex subunit organization	45	1.9e-05	2
		cellular macromolecular complex assembly	41	2.8e-05	2
		cellular component assembly	87	5e-05	1.5
		protein complex assembly	54	0.00022	1.7
		protein complex biogenesis	54	0.00022	1.7
		cellular component biogenesis	90	0.00073	1.4
		protein oligomerization	20	0.015	1.8
	Annotation Cluster 16	Enrichment Score: 3.71	No. Genes	p-value	Fold Change
		RNA splicing, via transesterification reactions	28	1.2e-06	2.9
		RNA splicing, via transesterification reactions with bulged adenosine as nucleophile	28	1.2e-06	2.9
		nuclear mRNA splicing, via spliceosome	28	1.2e-06	2.9
		mRNA processing	38	0.00033	1.9
		RNA splicing	34	0.00059	1.9
		mRNA metabolic process	40	0.0013	1.7
		RNA metabolic process	76	0.023	1.3
		RNA processing	41	0.2	1.2
	Annotation Cluster 17	Enrichment Score: 3.55	No. Genes	p-value	Fold Change
		regulation of biological process	509	7.5e-05	1.1
		regulation of metabolic process	279	0.00014	1.2
		biological regulation	529	0.00021	1.1
		regulation of cellular process	482	0.00072	1.1
		regulation of cellular metabolic process	261	0.0011	1.2
	Annotation Cluster 18	Enrichment Score: 3.22	No. Genes	p-value	Fold Change
		spindle checkpoint	7	4.3e-05	9.1
		regulation of mitosis	13	0.00017	3.6
		regulation of nuclear division	13	0.00017	3.6
		mitotic cell cycle checkpoint	11	0.00029	4
		mitotic cell cycle spindle assembly checkpoint	6	0.00035	8.6
		negative regulation of mitotic metaphase/anaphase transition	6	0.00035	8.6
		negative regulation of nuclear division	6	0.00056	7.8
		negative regulation of mitosis	6	0.00056	7.8
		negative regulation of cell cycle	14	0.0017	2.7
		negative regulation of organelle organization	14	0.0019	2.7
		negative regulation of cell cycle process	7	0.0041	4.4
		regulation of mitotic metaphase/anaphase transition	6	0.011	4.3
	Annotation Cluster 19	Enrichment Score: 3.17	No. Genes	p-value	Fold Change
		cytoskeleton organization	57	3.7e-07	2.1
		actin cytoskeleton organization	27	0.0025	1.9
		actin filament-based process	27	0.0059	1.8
		actin filament organization	10	0.038	2.2
	Annotation Cluster 20	Enrichment Score: 3.03	No. Genes	p-value	Fold Change
		positive regulation of biological process	212	4.4e-14	1.6
		positive regulation of cellular process	197	5.5e-14	1.7
		positive regulation of metabolic process	109	2.5e-10	1.9
		positive regulation of macromolecule metabolic process	103	3.6e-10	1.9
		positive regulation of cellular metabolic process	102	3.2e-09	1.8
		cellular metabolic process	496	3.5e-07	1.2
		metabolic process	552	5.1e-06	1.1
		primary metabolic process	504	1.1e-05	1.1
		macromolecule metabolic process	425	1.5e-05	1.2
		cellular macromolecule metabolic process	391	2.4e-05	1.2
		regulation of metabolic process	279	0.00014	1.2
		positive regulation of nitrogen compound metabolic process	64	0.00041	1.6
		nucleobase, nucleoside, nucleotide and nucleic acid metabolic process	259	0.00069	1.2
		nitrogen compound metabolic process	283	0.00086	1.2
		regulation of cellular metabolic process	261	0.0011	1.2
		positive regulation of gene expression	57	0.0012	1.5
		cellular nitrogen compound metabolic process	274	0.0013	1.2
		regulation of macromolecule metabolic process	243	0.0032	1.2
		regulation of primary metabolic process	245	0.0033	1.2
		positive regulation of nucleobase, nucleoside, nucleotide and nucleic acid metabolic process	58	0.0036	1.5
		positive regulation of RNA metabolic process	46	0.0061	1.5
		positive regulation of transcription	52	0.0069	1.4
		positive regulation of cellular biosynthetic process	61	0.0072	1.4
		positive regulation of transcription, DNA-dependent	45	0.0085	1.5
		positive regulation of biosynthetic process	61	0.0094	1.4
		positive regulation of macromolecule biosynthetic process	57	0.014	1.4
		regulation of transcription from RNA polymerase II promoter	59	0.043	1.3
		cellular biosynthetic process	242	0.046	1.1
		biosynthetic process	245	0.078	1.1
		cellular macromolecule biosynthetic process	196	0.093	1.1
		macromolecule biosynthetic process	197	0.097	1.1
		positive regulation of transcription from RNA polymerase II promoter	30	0.15	1.3
		regulation of nitrogen compound metabolic process	180	0.58	0.99
		regulation of nucleobase, nucleoside, nucleotide and nucleic acid metabolic process	174	0.72	0.97
		regulation of cellular biosynthetic process	182	0.73	0.97
		regulation of biosynthetic process	182	0.76	0.96
		regulation of gene expression	175	0.76	0.96
		regulation of macromolecule biosynthetic process	171	0.82	0.95
		regulation of RNA metabolic process	107	0.85	0.93
		regulation of transcription, DNA-dependent	103	0.88	0.91
		gene expression	178	0.89	0.93
		regulation of transcription	150	0.94	0.9
		transcription	113	0.99	0.84
	Annotation Cluster 21	Enrichment Score: 2.82	No. Genes	p-value	Fold Change
		anatomical structure formation involved in morphogenesis	41	0.00026	1.8
		blood vessel development	31	0.00043	2
		vasculature development	31	0.00065	1.9
		blood vessel morphogenesis	24	0.0082	1.8
		angiogenesis	18	0.013	1.9
	Annotation Cluster 22	Enrichment Score: 2.73	No. Genes	p-value	Fold Change
		regulation of cell migration	25	0.00018	2.3
		regulation of locomotion	26	0.00051	2.1
		regulation of cell motion	25	0.0013	2
		positive regulation of locomotion	15	0.0036	2.4
		positive regulation of cell migration	14	0.004	2.5
		regulation of localization	56	0.0055	1.4
		positive regulation of cell motion	14	0.0091	2.2
	Annotation Cluster 23	Enrichment Score: 2.7	No. Genes	p-value	Fold Change
		cell motion	50	0.00056	1.7
		cell migration	32	0.0015	1.8
		locomotion	44	0.0023	1.6
		localization of cell	33	0.0041	1.7
		cell motility	33	0.0041	1.7
	Annotation Cluster 24	Enrichment Score: 2.49	No. Genes	p-value	Fold Change
		DNA packaging	19	0.00042	2.5
		protein-DNA complex assembly	15	0.0018	2.6
		nucleosome organization	15	0.0022	2.5
		chromatin organization	38	0.0061	1.6
		nucleosome assembly	13	0.0067	2.4
		chromatin assembly or disassembly	17	0.0068	2.1
		chromatin assembly	13	0.0089	2.3
	Annotation Cluster 25	Enrichment Score: 2.33	No. Genes	p-value	Fold Change
		double-strand break repair	14	0.00012	3.5
		double-strand break repair via homologous recombination	5	0.029	4.1
		recombinational repair	5	0.029	4.1
	Annotation Cluster 26	Enrichment Score: 2.32	No. Genes	p-value	Fold Change
		regulation of DNA metabolic process	19	0.0003	2.6
		regulation of DNA replication	11	0.0055	2.8
		negative regulation of DNA metabolic process	8	0.011	3.2
		negative regulation of DNA replication	6	0.03	3.4
	Annotation Cluster 27	Enrichment Score: 2.27	No. Genes	p-value	Fold Change
		cellular response to hormone stimulus	21	0.00028	2.5
		response to peptide hormone stimulus	20	0.0042	2
		response to insulin stimulus	13	0.025	2
		cellular response to insulin stimulus	10	0.028	2.3
	Annotation Cluster 28	Enrichment Score: 2.26	No. Genes	p-value	Fold Change
		regulation of catalytic activity	97	1.5e-08	1.8
		regulation of cyclin-dependent protein kinase activity	14	2.5e-05	4.1
		regulation of phosphorus metabolic process	52	0.00027	1.7
		regulation of phosphate metabolic process	52	0.00027	1.7
		regulation of phosphorylation	50	0.00036	1.7
		regulation of kinase activity	38	0.0024	1.7
		regulation of protein kinase activity	37	0.0024	1.7
		regulation of transferase activity	38	0.0047	1.6
		positive regulation of kinase activity	23	0.038	1.6
		positive regulation of protein kinase activity	22	0.047	1.5
		positive regulation of transferase activity	23	0.054	1.5
		positive regulation of MAP kinase activity	9	0.32	1.4
		activation of protein kinase activity	9	0.44	1.2
		MAPKKK cascade	13	0.51	1.1
		regulation of MAP kinase activity	10	0.55	1.1
		activation of MAPK activity	6	0.6	1.1
	Annotation Cluster 29	Enrichment Score: 2.24	No. Genes	p-value	Fold Change
		DNA geometric change	6	0.0044	5.2
		DNA duplex unwinding	6	0.0044	5.2
		DNA unwinding during replication	5	0.0098	5.6
	Annotation Cluster 30	Enrichment Score: 2.24	No. Genes	p-value	Fold Change
		morphogenesis of an epithelium	18	0.0002	2.8
		epithelium development	30	0.00026	2.1
		tube development	28	0.00079	2
		morphogenesis of embryonic epithelium	12	0.00095	3.2
		tube morphogenesis	19	0.0011	2.3
		organ morphogenesis	54	0.0028	1.5
		tissue morphogenesis	22	0.0053	1.9
		epithelial tube morphogenesis	11	0.0095	2.6
		neural tube formation	8	0.012	3.1
		primary neural tube formation	7	0.017	3.3
		embryonic epithelial tube formation	8	0.018	2.9
		tube lumen formation	8	0.02	2.9
		neural tube development	10	0.028	2.3
		tube closure	6	0.039	3.1
		neural tube closure	6	0.039	3.1
		embryonic morphogenesis	27	0.084	1.4
	Annotation Cluster 31	Enrichment Score: 2.23	No. Genes	p-value	Fold Change
		tube development	28	0.00079	2
		tube morphogenesis	19	0.0011	2.3
		morphogenesis of a branching structure	12	0.0069	2.5
		branching morphogenesis of a tube	11	0.0077	2.7
		patterning of blood vessels	4	0.15	3
	Annotation Cluster 32	Enrichment Score: 2.11	No. Genes	p-value	Fold Change
		vascular process in circulatory system	11	0.0033	3
		vasodilation	7	0.005	4.2
		regulation of blood vessel size	10	0.0058	3
		regulation of tube size	10	0.0058	3
		circulatory system process	22	0.0076	1.9
		blood circulation	22	0.0076	1.9
		regulation of blood pressure	12	0.053	1.9
	Annotation Cluster 33	Enrichment Score: 2.05	No. Genes	p-value	Fold Change
		regulation of cell-substrate adhesion	10	0.0022	3.4
		regulation of cell adhesion	19	0.0027	2.2
		positive regulation of cell-substrate adhesion	6	0.03	3.4
		positive regulation of cell adhesion	9	0.036	2.4
	Annotation Cluster 34	Enrichment Score: 2.02	No. Genes	p-value	Fold Change
		peptidyl-amino acid modification	21	0.0034	2
		peptidyl-tyrosine modification	9	0.01	2.9
		peptidyl-tyrosine phosphorylation	8	0.025	2.7
	Annotation Cluster 35	Enrichment Score: 1.92	No. Genes	p-value	Fold Change
		regulation of developmental process	62	0.0032	1.4
		regulation of multicellular organismal process	79	0.0085	1.3
		regulation of cell differentiation	41	0.065	1.3
	Annotation Cluster 36	Enrichment Score: 1.88	No. Genes	p-value	Fold Change
		protein metabolic process	222	0.00024	1.2
		cellular protein metabolic process	188	0.00049	1.3
		post-translational protein modification	96	0.01	1.3
		phosphate metabolic process	77	0.035	1.2
		phosphorus metabolic process	77	0.035	1.2
		protein amino acid phosphorylation	55	0.039	1.3
		protein modification process	109	0.045	1.2
		biopolymer modification	113	0.057	1.2
		phosphorylation	62	0.078	1.2
	Annotation Cluster 37	Enrichment Score: 1.85	No. Genes	p-value	Fold Change
		mesenchymal cell differentiation	11	0.0012	3.4
		mesenchymal cell development	11	0.0012	3.4
		mesenchyme development	11	0.0014	3.3
		neural crest cell differentiation	6	0.056	2.9
		neural crest cell development	6	0.056	2.9
		epithelial to mesenchymal transition	4	0.1	3.5
		neural crest cell migration	4	0.18	2.7
	Annotation Cluster 38	Enrichment Score: 1.77	No. Genes	p-value	Fold Change
		locomotion	44	0.0023	1.6
		behavior	46	0.0039	1.5
		taxis	17	0.049	1.7
		chemotaxis	17	0.049	1.7
		locomotory behavior	25	0.07	1.4
	Annotation Cluster 39	Enrichment Score: 1.75	No. Genes	p-value	Fold Change
		antigen processing and presentation of peptide antigen	7	0.0074	3.9
		antigen processing and presentation of peptide antigen via MHC class I	5	0.02	4.6
		antigen processing and presentation	11	0.038	2.1
	Annotation Cluster 40	Enrichment Score: 1.74	No. Genes	p-value	Fold Change
		response to acid	7	0.0033	4.6
		response to amino acid stimulus	5	0.02	4.6
		response to amine stimulus	7	0.035	2.8
		response to organic nitrogen	9	0.046	2.2
	Annotation Cluster 41	Enrichment Score: 1.72	No. Genes	p-value	Fold Change
		regulation of cell size	24	0.0062	1.8
		cell growth	10	0.015	2.6
		growth	18	0.075	1.5
	Annotation Cluster 42	Enrichment Score: 1.72	No. Genes	p-value	Fold Change
		lymphocyte mediated immunity	13	0.0014	2.9
		immune effector process	19	0.0021	2.2
		leukocyte mediated immunity	14	0.003	2.6
		somatic cell DNA recombination	7	0.0033	4.6
		somatic diversification of immune receptors via germline recombination within a single locus	7	0.0033	4.6
		somatic recombination of immunoglobulin gene segments	6	0.0044	5.2
		somatic diversification of immune receptors	7	0.0061	4.1
		somatic diversification of immunoglobulins	6	0.011	4.3
		somatic hypermutation of immunoglobulin genes	4	0.016	7
		somatic diversification of immune receptors via somatic mutation	4	0.016	7
		somatic diversification of immunoglobulins during immune response	4	0.037	5.2
		somatic recombination of immunoglobulin genes during immune response	4	0.037	5.2
		isotype switching	4	0.037	5.2
		immunoglobulin production	6	0.039	3.1
		production of molecular mediator of immune response	6	0.044	3
		immunoglobulin production during immune response	4	0.046	4.8
		B cell activation	10	0.052	2.1
		immunoglobulin mediated immune response	8	0.054	2.3
		B cell mediated immunity	8	0.064	2.2
		adaptive immune response	9	0.12	1.8
		adaptive immune response based on somatic recombination of immune receptors built from immunoglobulin superfamily domains	9	0.12	1.8
		mismatch repair	4	0.21	2.5
	Annotation Cluster 43	Enrichment Score: 1.68	No. Genes	p-value	Fold Change
		spindle checkpoint	7	4.3e-05	9.1
		establishment of organelle localization	9	0.071	2
		establishment of chromosome localization	3	0.25	3.1
		chromosome localization	3	0.25	3.1
	Annotation Cluster 44	Enrichment Score: 1.6	No. Genes	p-value	Fold Change
		steroid hormone receptor signaling pathway	10	0.011	2.7
		intracellular receptor-mediated signaling pathway	11	0.02	2.3
		androgen receptor signaling pathway	6	0.076	2.6
	Annotation Cluster 45	Enrichment Score: 1.57	No. Genes	p-value	Fold Change
		hemopoietic progenitor cell differentiation	5	0.0038	7.1
		lymphoid progenitor cell differentiation	4	0.0074	9
		regulation of protein stability	7	0.048	2.6
		T cell differentiation	6	0.4	1.4
	Annotation Cluster 46	Enrichment Score: 1.57	No. Genes	p-value	Fold Change
		natural killer cell mediated immunity	4	0.011	7.8
		natural killer cell mediated cytotoxicity	4	0.011	7.8
		leukocyte mediated cytotoxicity	4	0.022	6.3
		cell killing	4	0.19	2.6
	Annotation Cluster 47	Enrichment Score: 1.56	No. Genes	p-value	Fold Change
		glucose metabolic process	21	0.0017	2.2
		glycolysis	10	0.0025	3.3
		glucose catabolic process	10	0.011	2.7
		hexose metabolic process	22	0.011	1.8
		monosaccharide metabolic process	23	0.026	1.6
		hexose catabolic process	10	0.03	2.3
		alcohol catabolic process	11	0.032	2.1
		monosaccharide catabolic process	10	0.036	2.2
		cellular carbohydrate catabolic process	11	0.043	2
		cellular carbohydrate metabolic process	33	0.078	1.3
		alcohol metabolic process	36	0.078	1.3
		carbohydrate catabolic process	12	0.087	1.7
		carbohydrate metabolic process	34	0.58	1
	Annotation Cluster 48	Enrichment Score: 1.53	No. Genes	p-value	Fold Change
		nucleoside metabolic process	13	0.00063	3.2
		pyrimidine nucleoside metabolic process	8	0.00072	5
		pyrimidine nucleotide metabolic process	8	0.0068	3.5
		ribonucleoside metabolic process	9	0.0079	3.1
		pyrimidine ribonucleoside metabolic process	5	0.02	4.6
		pyrimidine nucleotide biosynthetic process	5	0.048	3.6
		pyrimidine nucleoside triphosphate metabolic process	4	0.055	4.5
		pyrimidine ribonucleotide biosynthetic process	4	0.066	4.2
		pyrimidine ribonucleotide metabolic process	4	0.078	3.9
		pyrimidine ribonucleoside triphosphate metabolic process	3	0.13	4.7
		pyrimidine ribonucleoside triphosphate biosynthetic process	3	0.13	4.7
		CTP metabolic process	3	0.13	4.7
		CTP biosynthetic process	3	0.13	4.7
		pyrimidine nucleoside triphosphate biosynthetic process	3	0.18	3.9
	Annotation Cluster 49	Enrichment Score: 1.53	No. Genes	p-value	Fold Change
		defense response	56	0.0064	1.4
		response to wounding	46	0.029	1.4
		inflammatory response	27	0.14	1.3
	Annotation Cluster 50	Enrichment Score: 1.52	No. Genes	p-value	Fold Change
		response to corticosterone stimulus	5	0.016	4.9
		response to corticosteroid stimulus	12	0.019	2.2
		response to glucocorticoid stimulus	11	0.026	2.2
		response to mineralocorticoid stimulus	5	0.035	3.9
		response to toxin	8	0.092	2.1
	Annotation Cluster 51	Enrichment Score: 1.5	No. Genes	p-value	Fold Change
		regulation of centrosome cycle	4	0.011	7.8
		regulation of microtubule-based process	8	0.034	2.6
		regulation of microtubule cytoskeleton organization	7	0.048	2.6
		regulation of centrosome duplication	3	0.051	7.8
	Annotation Cluster 52	Enrichment Score: 1.5	No. Genes	p-value	Fold Change
		nucleic acid transport	14	0.0084	2.3
		RNA transport	14	0.0084	2.3
		establishment of RNA localization	14	0.0084	2.3
		RNA localization	14	0.011	2.2
		nucleobase, nucleoside, nucleotide and nucleic acid transport	15	0.012	2.1
		mRNA transport	12	0.022	2.2
		nucleocytoplasmic transport	16	0.072	1.6
		nuclear transport	16	0.079	1.6
		RNA export from nucleus	6	0.12	2.3
		mRNA export from nucleus	5	0.16	2.4
		nuclear export	7	0.18	1.8
	Annotation Cluster 53	Enrichment Score: 1.47	No. Genes	p-value	Fold Change
		regulation of cell growth	23	0.0061	1.9
		regulation of cell size	24	0.0062	1.8
		negative regulation of growth	12	0.091	1.7
		negative regulation of cell size	11	0.099	1.7
		negative regulation of cell growth	10	0.13	1.7
	Annotation Cluster 54	Enrichment Score: 1.47	No. Genes	p-value	Fold Change
		response to radiation	23	0.0086	1.8
		response to light stimulus	15	0.057	1.7
		response to UV	8	0.08	2.1
	Annotation Cluster 55	Enrichment Score: 1.46	No. Genes	p-value	Fold Change
		protein polymerization	9	0.012	2.9
		actin filament polymerization	4	0.029	5.7
		actin filament organization	10	0.038	2.2
		actin polymerization or depolymerization	4	0.12	3.3
	Annotation Cluster 56	Enrichment Score: 1.4	No. Genes	p-value	Fold Change
		reproductive developmental process	32	0.00063	1.9
		reproduction	71	0.0013	1.5
		reproductive process	70	0.0018	1.4
		germ cell development	15	0.0047	2.3
		reproductive cellular process	20	0.0073	1.9
		spermatid development	7	0.13	2
		sexual reproduction	36	0.15	1.2
		spermatid differentiation	7	0.15	1.9
		gamete generation	31	0.18	1.2
		multicellular organism reproduction	37	0.19	1.2
		reproductive process in a multicellular organism	37	0.19	1.2
		male gamete generation	18	0.76	0.92
		spermatogenesis	18	0.76	0.92
	Annotation Cluster 57	Enrichment Score: 1.37	No. Genes	p-value	Fold Change
		establishment of cell polarity	6	0.0072	4.7
		spindle localization	4	0.022	6.3
		establishment of spindle localization	4	0.022	6.3
		establishment of organelle localization	9	0.071	2
		establishment of mitotic spindle localization	3	0.088	5.9
		establishment or maintenance of cell polarity	7	0.089	2.2
		organelle localization	10	0.13	1.7
	Annotation Cluster 58	Enrichment Score: 1.36	No. Genes	p-value	Fold Change
		organic acid metabolic process	52	0.0061	1.5
		monocarboxylic acid metabolic process	31	0.0099	1.6
		carboxylic acid metabolic process	50	0.013	1.4
		oxoacid metabolic process	50	0.013	1.4
		cellular ketone metabolic process	50	0.018	1.4
		cellular amine metabolic process	25	0.17	1.3
		amine metabolic process	31	0.2	1.2
		cellular amino acid metabolic process	18	0.27	1.2
		cellular amino acid and derivative metabolic process	25	0.38	1.1
	Annotation Cluster 59	Enrichment Score: 1.33	No. Genes	p-value	Fold Change
		cellular metal ion homeostasis	24	0.0033	1.9
		metal ion homeostasis	24	0.0058	1.8
		cellular calcium ion homeostasis	21	0.013	1.8
		calcium ion homeostasis	21	0.017	1.8
		cellular cation homeostasis	26	0.02	1.6
		cellular di-, tri-valent inorganic cation homeostasis	23	0.032	1.6
		di-, tri-valent inorganic cation homeostasis	23	0.052	1.5
		cation homeostasis	26	0.067	1.4
		cytosolic calcium ion homeostasis	13	0.073	1.7
		cellular ion homeostasis	32	0.079	1.3
		cellular chemical homeostasis	32	0.093	1.3
		cellular homeostasis	38	0.097	1.3
		homeostatic process	57	0.12	1.2
		ion homeostasis	32	0.18	1.2
		chemical homeostasis	39	0.18	1.2
		elevation of cytosolic calcium ion concentration	10	0.27	1.4
	Annotation Cluster 60	Enrichment Score: 1.32	No. Genes	p-value	Fold Change
		response to vitamin	11	0.0085	2.6
		response to extracellular stimulus	24	0.013	1.7
		response to nutrient levels	20	0.046	1.6
		response to nutrient	14	0.11	1.6
		response to vitamin A	6	0.13	2.2
		response to retinoic acid	5	0.16	2.4
	Annotation Cluster 61	Enrichment Score: 1.31	No. Genes	p-value	Fold Change
		regulation of cytoskeleton organization	19	0.0025	2.2
		regulation of actin cytoskeleton organization	12	0.025	2.1
		regulation of actin filament-based process	12	0.032	2
		regulation of cellular component biogenesis	16	0.037	1.8
		regulation of actin polymerization or depolymerization	9	0.039	2.3
		regulation of actin filament length	9	0.046	2.2
		regulation of protein complex assembly	11	0.06	1.9
		regulation of actin filament polymerization	7	0.13	2
		regulation of protein polymerization	8	0.14	1.8
		regulation of actin filament depolymerization	3	0.52	1.7
	Annotation Cluster 62	Enrichment Score: 1.3	No. Genes	p-value	Fold Change
		regulation of caspase activity	11	0.028	2.2
		positive regulation of caspase activity	9	0.033	2.4
		positive regulation of peptidase activity	9	0.033	2.4
		regulation of endopeptidase activity	11	0.035	2.1
		positive regulation of hydrolase activity	19	0.037	1.7
		regulation of peptidase activity	11	0.046	2
		activation of caspase activity	8	0.054	2.3
		regulation of hydrolase activity	24	0.4	1.1
	* Enrichment Score is the -log10 of the average p-value of the terms in the cluster. Fold change is the ratio of the proportion of genes in the tested list versus the Human Gene Reference database.
